# Supplementary material for: Targeting protein arginine methyltransferase 5 inhibits colorectal cancer growth by decreasing arginine methylation of eIF4E and FGFR3
Source: PubMed Central journal article supplement (PMC4673200; doi:10.18632/oncotarget.4332), 2015-06-02
Supplement: oncotarget-06-22799-s001.pdf [file oncotarget-06-22799-s001.pdf]

# Targeting protein arginine methyltransferase 5 inhibits colorectal cancer growth by decreasing arginine methylation of eIF4E and FGFR3

## SupplementaryMaterial

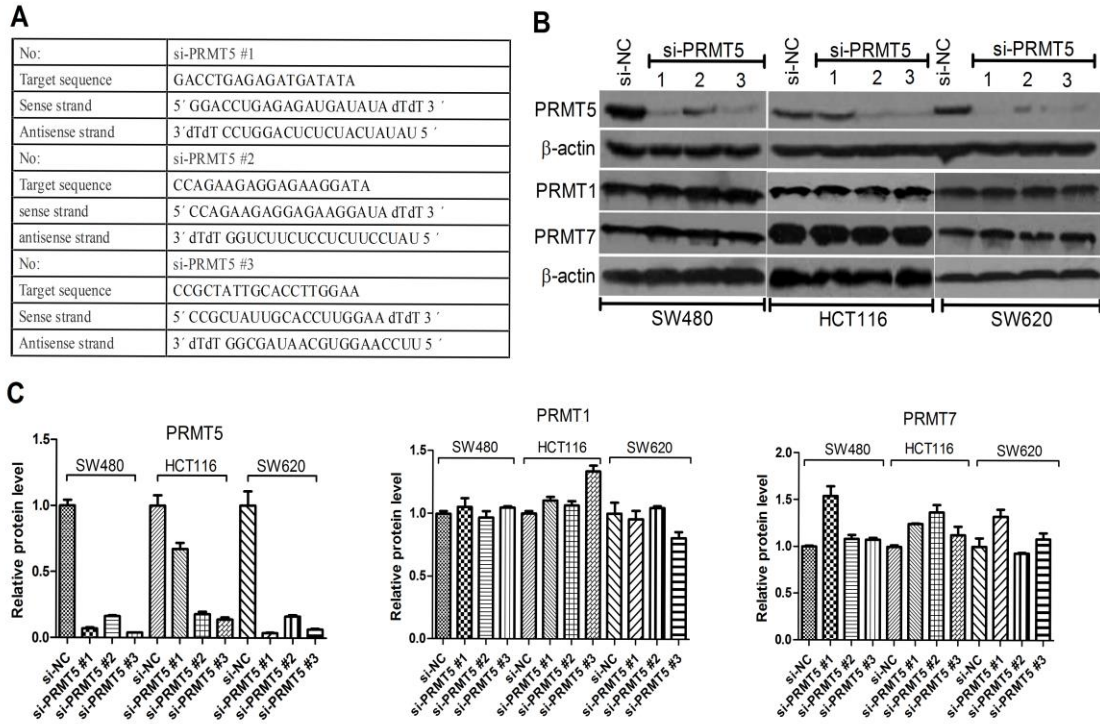

**Supplementary Figure 1: The PRMT5 siRNA sequences and their effects on PRMT5, PRMT1 and PRMT7 expression in CRC cells.**

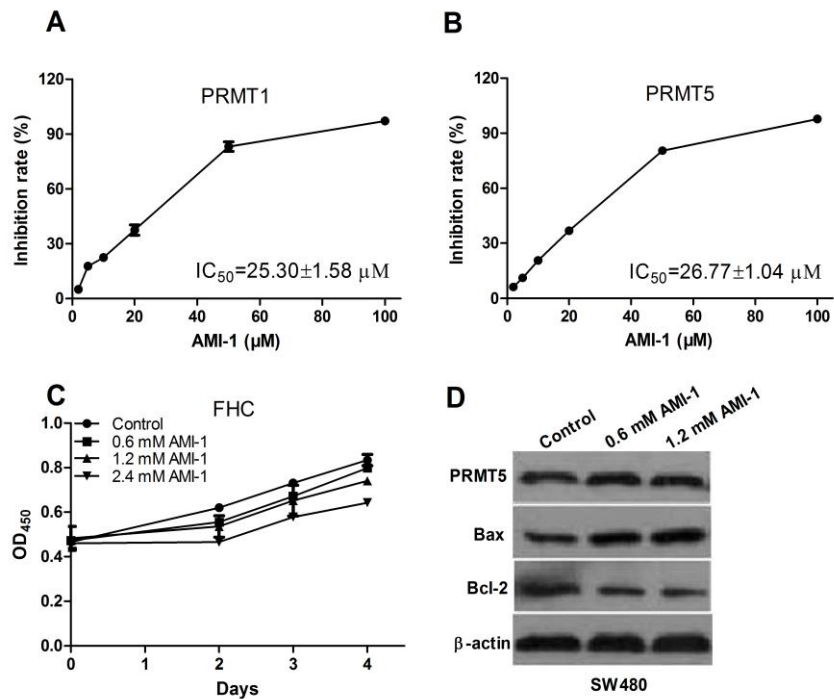

**Supplementary Figure 2:** (A) The effect of AMI-1 on PRMT1 activity. (B) The effect of AMI-1 on PRMT5 activity. (C) The effect of AMI-1 on the proliferation of normal colonic mucosal FHC cells. (D) SW480 cells were treated with AMI-1 for 48 h. Protein expression of Bax and Bcl-2 were analyzed by Western blot analysis.

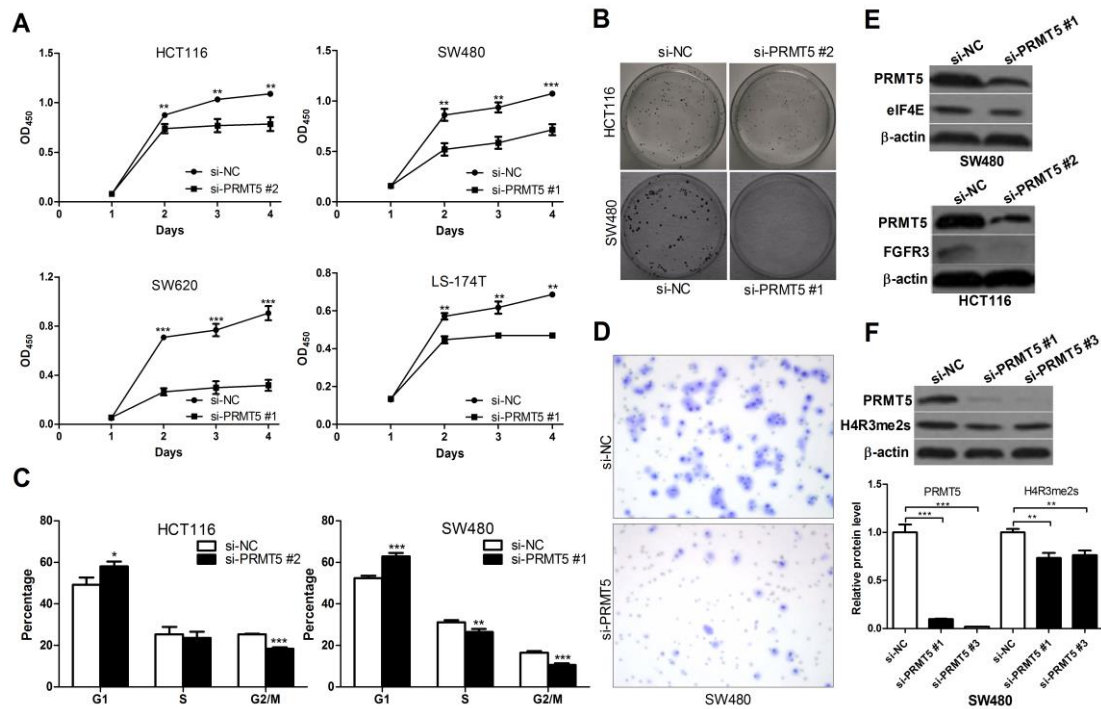

**Supplementary Figure 3: Silencing PRMT5 decreases CRC cell growth *in vitro*.**

(A) The effects of si-PRMT5 on the proliferation of CRC HCT116, SW620, SW480, and LS-174T cells. (B) The effects of si-PRMT5 on colony formation of CRC cells (HCT116 and SW480). (C) Knockdown of PRMT5 led to cell G1 arrest. (D) Knockdown of PRMT5 decreased migratory activity of CRC cells measured by Transwell assay. Representative photos of stained cells are shown with original magnification 200 $\times$ . Controls were vehicle-treated group. (E) SW480 and HCT116 cells were transfected with si-NC or si-PRMT5 and FGFR3 and eIF4E protein expression was analyzed by Western blot analysis 72 h later. (F) SW480 cells were transfected with si-NC or si-PRMT5 and H4R3me2s level was analyzed by Western blot analysis 72 h later.

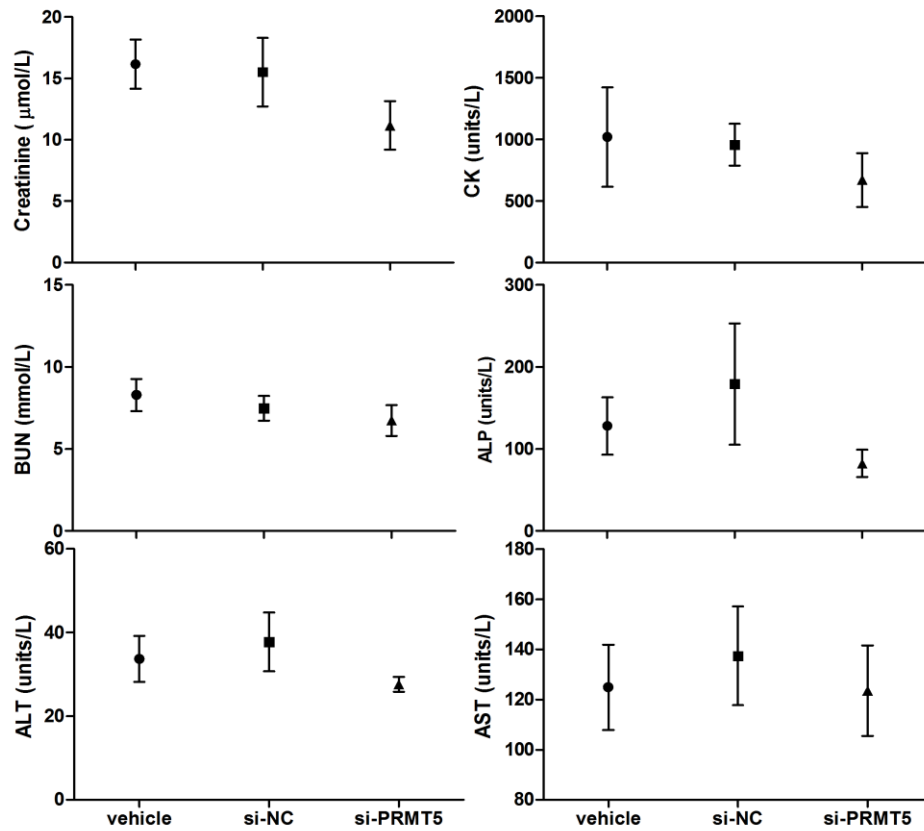

**Supplementary Figure 4:** Serum levels of blood urea nitrogen (BUN), creatinine, alkaline phosphatase (ALP), alanine aminotransferase (ALT), aspartate aminotransferase (AST), and creatine kinase (CK) of the animals described in Fig. 5E after sacrifice. Points, average of five animals.

**Supplementary Table 1: Primers used in this study**

| Method    | Primer name      | Sequence                       |
|-----------|------------------|--------------------------------|
| qRT-PCR   | $\beta$ -actin-F | 5'-TGACGTGGACATCCGCAAAG-3'     |
|           | $\beta$ -actin-R | 5'-CTGGAAGGTGGACAGCGAGG-3'     |
|           | PRMT5-F          | 5'-CAATGAGGTCCGAGCCTGTAG-3'    |
|           | PRMT5-R          | 5'-GCGGTTGTTGTCAATCATAGGA-3'   |
|           | FGFR3-F          | 5'-AGGACGAGGCTGAGGACACA-3'     |
|           | FGFR3-R          | 5'-TGGAGGGAGTGGGGTTGC-3'       |
|           | eIF4E -F         | 5'-GAAAACGGAATCTAATCAGGAGG-3'  |
|           | eIF4E -R         | 5'-GCCCAAAGTCTTCAACAGTATCA-3'  |
| qPCR-ChIP | Primer name      | Sequence                       |
|           | GAPDH-F          | 5'-TACTAGCGGTTTTACGGGCG-3'     |
|           | GAPDH-R          | 5'-TCGAACAGGAGGAGCAGAGAGCGA-3' |
|           | FGFR3-F          | 5'-ATGGTGAAGCCCCGTCTCTAC-3'    |
|           | FGFR3-R          | 5'-CTGCCTCCCTGATTGAAGTGA-3'    |
|           | eIF4E -F         | 5'-TGGTAGAATCTCAAATAGGCAAAG-3' |
|           | eIF4E -R         | 5'-ACAGAGTTTCAGGAAAATCTCCA-3'  |

**Supplementary Table 2: Antibodies used in this study**

| Antibodies                                                  | Company                                 | Catalog Number | Western blot | ChIP |
|-------------------------------------------------------------|-----------------------------------------|----------------|--------------|------|
| PRMT5(A-11)                                                 | Santa Cruz Biotech, Santa Cruz, CA, USA | sc-376937      | 1:400        | 2 µg |
| eIF4E(P-2)                                                  | Santa Cruz Biotech                      | sc-9976        | 1:500        |      |
| FGFR3(C-15)                                                 | Santa Cruz Biotech                      | sc-123         | 1:200        |      |
| Bax(N-20)                                                   | Santa Cruz Biotech                      | sc-493         | 1:200        |      |
| Bcl-2(N-19)                                                 | Santa Cruz Biotech                      | sc-492         | 1:500        |      |
| β-Actin(13E5)                                               | Cell Signaling, Danvers, MA, USA        | 4970           | 1:2000       |      |
| Phospho-Akt (Thr308)(244F9)                                 | Cell Signaling                          | 4056           | 1:1000       |      |
| PRMT7 (D1K6R)                                               | Cell Signaling                          | 4762           | 1:1000       |      |
| AKT(pan)(11E7)                                              | Cell Signaling                          | 4685           | 1:1000       |      |
| Phospho-p44/42 MAPK (Erk1/2) (Thr202/Tyr204) (D13.14.4E) XP | Cell Signaling                          | 4370           | 1:2000       |      |
| p44/42 MAPK(Erk1/2)(137F5)                                  | Cell Signaling                          | 4695           | 1:2000       |      |
| Phospho-mTOR (Ser2448) (D9C2)XP                             | Cell Signaling                          | 5536           | 1:1000       |      |
| mTOR(7C10)                                                  | Cell Signaling                          | 2983           | 1:1000       |      |
| p53 antibody                                                | Cell Signaling                          | 9282           | 1:1000       |      |
| H3(Me2)R8                                                   | NOVUS                                   | NB21-1063      | 1:250        | 4 µg |
| H4(Me2)R3                                                   | Abcam                                   | Ab5823         | 1:2000       | 2 µg |
| PRMT1                                                       | Abcam                                   | Ab7027         | 1:800        |      |
| IgG                                                         | Millipore                               |                |              | 1 µg |
